# Supplementary material for: MicroRNAs within Basal-Like Signature of Quadruple Negative Breast Cancer Impact Overall Survival in African Americans
Source: Preprints.org preprint supplement (doi:10.20944/preprints202207.0409.v1), 2022-07-27
Supplement: Supplementary file 1 [file supplementary]

## Sheet: Table S1
Table S1. Over all AR negative vs Positive
miRNA	log2FC	P-adj
hsa-mir-135b	3.3 (Up)	5.21e-126
hsa-mir-584	1.7 (Up)	1.04e-104
hsa-mir-17	1.4 (Up)	9.36e-116
hsa-mir-20a	1.2 (Up)	2.39e-60
hsa-mir-532	0.6 (Up)	1.58e-44
hsa-mir-29c	-0.9 (Down)	2.72E-26
hsa-mir-375	-1.0 (Down)	2.52E-14
hsa-mir-10a	-1.4 (Down)	2.74E-45

## Sheet: Table S2
Table S2. QNBC compared to TNBC AR positive
miRNA	log2FC	p-adj
hsa-mir-135b	2.2 (Up)	0.00641516
hsa-mir-584	1.5 (Up)	0.000490142
hsa-mir-20a	1.4 (Up)	4.27e-05
hsa-mir-17	1.3 (Up)	6.62e-05
hsa-mir-532	0.6 (Up)	0.0252835
hsa-mir-10a	-1.3 (Down)	0.016664581
hsa-mir-375	-1.8 (Down)	0.006761255
hsa-mir-29c	-0.7 (Down)	0.162012123

## Sheet: Table S3
Table S3. miRNA to related gene correlation coefficient
		MYC	MIR17HG	FOXA1
hsa-mir-17	mRNA	0.47	0.5	-0.41
	protein	0.28	N/A	-0.44
hsa-mir-20a	mRNA	0.42	0.47	-0.35
	protein	0.25	N/A	-0.38
		CCNG2	GATA3
hsa-mir-135b	mRNA	-0.28	-0.46
	protein	N/A	-0.47
		TNF
hsa-mir-10a	mRNA	-0.21
	protein	N/A
		CTNNB1	IL1B	KLF5	RUNX3
hsa-mir-375	mRNA	-0.12	-0.16	-0.25	-0.37
	protein	-0.16	-0.27	-0.12	-0.17
		CD276	CDK6	CDKN2A
hsa-mir-29c	mRNA	-0.3	-0.33	-0.29
	protein	-0.17	-0.31	-0.24

## Sheet: Table S4
Table S4. miRNAs DE in over all AR negative compared to positive.
miRNA	Base Mean	log2FC	P-adj	Chromosome
hsa-mir-934	20.03	4.8	8.5e-142	chrX
hsa-mir-577	36.51	4.7	9.49e-176	chr4
hsa-mir-522	5.68	3.9	1.53e-37	chr19
hsa-mir-519a-1	13.19	3.8	2.27e-69	chr19
hsa-mir-516a-1	5.12	3.8	2.18e-57	chr19
hsa-mir-135b	65.7	3.3	5.21e-126	chr1
hsa-mir-519a-2	7.83	2.8	1.76e-27	chr19
hsa-mir-105-2	45.85	2.3	2.26e-13	chrX
hsa-mir-885	8.06	2.3	2.05e-33	chr3
hsa-mir-9-2	2942.54	2.3	1.48e-63	chr5
hsa-mir-9-1	2944.73	2.3	2.2e-63	chr1
hsa-mir-9-3	2951.94	2.3	1.91e-63	chr15
hsa-mir-767	32.23	2.2	4e-12	chrX
hsa-mir-18a	53.2	2.1	2.91e-123	chr13
hsa-mir-105-1	39.49	2	4.57e-10	chrX
hsa-mir-584	167.52	1.7	1.04e-104	chr5
hsa-mir-937	11.95	1.5	1.54e-35	chr8
hsa-mir-129-2	5.85	1.5	8.61e-26	chr11
hsa-mir-224	157.96	1.5	9.21e-27	chrX
hsa-mir-1269a	186	1.4	1.02e-06	chr4
hsa-mir-455	769.34	1.4	1.35e-72	chr9
hsa-mir-17	3323.2	1.4	9.36e-116	chr13
hsa-mir-31	24.7	1.3	4.86e-32	chr9
hsa-mir-129-1	5.37	1.3	6.33e-20	chr7
hsa-mir-19a	90.58	1.3	2.49e-70	chr13
hsa-mir-452	200.43	1.2	2.03e-28	chrX
hsa-mir-505	140.56	1.2	2.23e-88	chrX
hsa-mir-877	6.06	1.2	1.04e-33	chr6
hsa-mir-20a	769.92	1.2	2.39e-60	chr13
hsa-mir-188	8.33	1.1	1.58e-44	chrX
hsa-mir-3200	14.25	1.1	2.05e-23	chr22
hsa-mir-942	16.05	1	2.97e-41	chr1
hsa-mir-146a	417.27	1	5.94e-37	chr5
hsa-mir-19b-1	226.61	1	1.64e-56	chr13
hsa-mir-375	87622.9	-1	2.52e-14	chr2
hsa-mir-196a-2	1347.35	-1.1	2.3e-18	chr12
hsa-mir-196a-1	1162.97	-1.2	9.32e-19	chr17
hsa-mir-135a-1	8.08	-1.2	7.38e-09	chr3
hsa-mir-2115	5.39	-1.2	2.3e-09	chr3
hsa-mir-135a-2	9.6	-1.3	2.36e-10	chr12
hsa-mir-10a	121503	-1.4	2.74e-45	chr17
hsa-mir-190b	65.09	-1.7	2.96e-44	chr1
hsa-mir-184	179.08	-1.8	5.57e-21	chr15
hsa-mir-449b	6.18	-3	5.32e-26	chr5
hsa-mir-449a	34.19	-4	3.75e-59	chr5

## Sheet: Table S5
Table S5. miRNAs DE in QNBC compared to TNBC AR positive.
miRNA	Base Mean	log2FC	P-adj	Chromosome
hsa-mir-519a-1	18.65	3.6	0.003044	chr19
hsa-mir-516a-2	6.09	3.6	0.016665	chr19
hsa-mir-516a-1	6.7	3.5	0.016326	chr19
hsa-mir-129-2	5.77	2.4	0.000589	chr11
hsa-mir-129-1	5.3	2.4	0.00131	chr7
hsa-mir-135b	65.7	2.2	0.006415	chr1
hsa-mir-584	167.52	1.5	0.00049	chr5
hsa-mir-455	769.34	1.4	0.000564	chr9
hsa-mir-20a	769.92	1.4	4.27e-05	chr13
hsa-mir-4661	12.93	1.4	0.010915	chr8
hsa-mir-20b	118.21	1.3	0.033979	chrX
hsa-mir-17	3323.2	1.3	6.62e-05	chr13
hsa-mir-106a	145.7	1.1	0.016326	chrX
hsa-mir-92a-1	14131.1	0.9	0.001852	chr13
hsa-mir-92a-2	12805.4	0.9	0.001873	chrX
hsa-mir-500b	24.6	0.9	0.017844	chrX
hsa-mir-222	157.81	0.9	0.025284	chrX
hsa-mir-19b-2	203.04	0.8	0.016665	chrX
hsa-mir-214	114.82	0.8	0.032058	chr1
hsa-mir-19b-1	226.61	0.8	0.01506	chr13
hsa-mir-23a	20190.2	0.7	0.000589	chr19
hsa-mir-181a-2	4819.78	0.6	0.032058	chr9
hsa-mir-532	2049.49	0.6	0.025284	chrX
hsa-mir-24-2	2095.89	0.6	0.024223	chr19
hsa-mir-24-1	2042.37	0.6	0.030062	chr9
hsa-mir-664a	146.92	-0.7	0.032058	chr1
hsa-mir-193b	414.91	-0.7	0.032058	chr16
hsa-mir-625	839.22	-0.8	0.043634	chr14
hsa-mir-382	79.17	-0.8	0.039173	chr14
hsa-mir-758	61.97	-0.9	0.039173	chr14
hsa-mir-10b	285851	-1	0.016665	chr2
hsa-mir-615	36.07	-1.2	0.032058	chr12
hsa-mir-3677	39.36	-1.2	0.033979	chr16
hsa-mir-940	16.21	-1.3	0.019216	chr16
hsa-mir-10a	121503	-1.3	0.016665	chr17
hsa-mir-196a-2	1347.35	-1.5	0.032058	chr12
hsa-mir-196a-1	1162.97	-1.6	0.025522	chr17
hsa-mir-375	87622.9	-1.8	0.006761	chr2
hsa-mir-190b	65.09	-2.7	3.04e-07	chr1
hsa-mir-2115	5.75	-4.7	8.22e-08	chr3

## Sheet: Table S6
Table S6. miRNAs DE in over all samples AA compared to CA.
miRNA	Base Mean	Log2FC	P-adj	Chromosome
hsa-mir-519a-1	9.87	2	3.26e-12	chr19
hsa-mir-516a-1	5.12	2	4.95e-09	chr19
hsa-mir-1269b	24.92	1.4	0.011747	chr17
hsa-mir-767	26.37	1.3	0.000791	chrX
hsa-mir-519a-2	5.69	1.3	0.00013	chr19
hsa-mir-129-2	5.85	1.2	2.3e-12	chr11
hsa-mir-129-1	5.37	1.2	2.98e-11	chr7
hsa-mir-2115	5.75	1.1	2.18e-05	chr3
hsa-mir-224	157.96	1.1	4.24e-10	chrX
hsa-mir-452	200.43	1.1	8.08e-15	chrX
hsa-mir-934	20.03	1	0.001379	chrX
hsa-mir-217	67.9	1	3.09e-15	chr2
hsa-mir-20a	769.92	0.9	2.52e-24	chr13
hsa-mir-135b	65.7	0.9	2.62e-05	chr1
hsa-mir-660	104.61	0.9	2.26e-37	chrX
hsa-mir-18a	53.2	0.8	2.92e-09	chr13
hsa-mir-383	5.7	0.7	0.024105	chr8
hsa-mir-937	11.95	0.7	2.34e-06	chr8
hsa-mir-500b	24.6	0.7	1.05e-18	chrX
hsa-mir-93	16091.6	0.7	7.04e-26	chr7
hsa-mir-3615	13.24	0.7	4.08e-12	chr17
hsa-mir-584	167.52	0.7	2.55e-10	chr5
hsa-mir-362	35.39	0.7	2e-14	chrX
hsa-mir-17	3323.2	0.6	3.83e-12	chr13
hsa-mir-135a-2	14.47	0.6	0.040678	chr12
hsa-mir-500a	1446.64	0.6	1.08e-17	chrX
hsa-mir-181b-2	589.08	0.6	9.41e-13	chr9
hsa-mir-877	6.06	0.6	7.18e-06	chr6
hsa-mir-532	2049.49	0.6	2.74e-23	chrX
hsa-mir-494	5.56	-0.6	5.88e-06	chr14
hsa-mir-3677	39.36	-0.6	5.33e-06	chr16
hsa-mir-34c	48.96	-0.6	4.88e-06	chr11
hsa-mir-431	41.22	-0.6	8.48e-07	chr14
hsa-let-7b	94864.1	-0.6	2.27e-12	chr22
hsa-mir-326	33.92	-0.6	4.06e-07	chr11
hsa-mir-642a	15.55	-0.6	3.54e-06	chr19
hsa-mir-3605	11.67	-0.6	3.86e-08	chr1
hsa-mir-628	117.77	-0.6	4.56e-09	chr15
hsa-mir-34b	9.24	-0.6	3.16e-06	chr11
hsa-mir-323b	14.4	-0.6	5.45e-06	chr14
hsa-mir-337	137.77	-0.7	3.97e-11	chr14
hsa-mir-134	1321.87	-0.7	2.55e-14	chr14
hsa-mir-3170	6.79	-0.7	4.91e-09	chr13
hsa-mir-935	11.77	-0.7	0.000358	chr19
hsa-mir-323a	13.83	-0.7	6.39e-08	chr14
hsa-mir-10a	121503	-0.7	1.18e-08	chr17
hsa-mir-4668	14.52	-0.7	1.25e-11	chr9
hsa-mir-196b	1097.65	-0.8	1.63e-10	chr7
hsa-mir-539	36.09	-0.8	9.74e-14	chr14
hsa-mir-653	66.83	-0.8	1.79e-10	chr7
hsa-mir-551b	6.22	-0.8	1.37e-09	chr3
hsa-mir-374c	7.29	-0.9	0.01274	chrX
hsa-mir-135a-1	10.89	-0.9	0.001425	chr3
hsa-mir-1258	5.22	-0.9	4.92e-09	chr2
hsa-mir-3607	284.27	-0.9	1.18e-16	NA
hsa-mir-891a	7.35	-1	1.23e-07	chrX
hsa-mir-449a	34.71	-1.2	0.000128	chr5
hsa-mir-449b	6.32	-1.3	0.000503	chr5
hsa-mir-483	24.76	-1.4	2.74e-23	chr11
hsa-mir-184	220.46	-1.6	1.59e-11	chr15
hsa-mir-153-2	155.5	-1.6	6.07e-24	chr7
hsa-mir-1269a	240.32	-1.9	2.57e-07	chr4
hsa-mir-153-1	8.52	-1.9	5.71e-23	chr2

## Sheet: Table S7
Table S7. miRNAs DE in over all samples AA compared to CA in QNBC
miRNA	Base Mean	log2FC	P-value	P-adj	Chromosome
hsa-mir-129-2	8.07	3.5	2.26e-13	2.82e-11	chr11
hsa-mir-129-1	7.27	3.4	4.52e-12	4.03e-10	chr7
hsa-mir-217	77.86	1.9	2.41e-08	1.16e-06	chr2
hsa-mir-363	57.36	1.2	0.000435	0.005311	chrX
hsa-mir-29c	11003.7	1.2	3.78e-06	8.75e-05	chr1
hsa-mir-20b	127.08	1	0.006116	0.038945	chrX
hsa-mir-92b	393.4	0.9	0.000179	0.002661	chr1
hsa-mir-660	104.61	0.7	4.36e-05	0.000798	chrX
hsa-mir-101-2	17318.6	0.7	0.000498	0.005649	chr9
hsa-mir-101-1	17210.2	0.7	0.000527	0.00587	chr1
hsa-mir-339	165.74	-0.6	0.001391	0.01204	chr7
hsa-mir-590	57.44	-0.6	0.001905	0.015645	chr7
hsa-mir-99b	124367	-0.6	0.000823	0.008147	chr19
hsa-mir-491	13.17	-0.6	0.007189	0.044417	chr9
hsa-mir-130b	73.03	-0.6	0.002804	0.021081	chr22
hsa-mir-127	2846	-0.7	0.001409	0.01204	chr14
hsa-mir-30c-1	2833.08	-0.8	0.000212	0.003002	chr1
hsa-mir-889	42.7	-0.8	0.002475	0.018937	chr14
hsa-mir-3074	44.72	-0.8	0.000798	0.008147	chr9
hsa-mir-495	24.48	-0.9	0.000878	0.008429	chr14
hsa-mir-323a	12.42	-0.9	0.00355	0.02517	chr14
hsa-mir-382	80.14	-0.9	0.000113	0.001802	chr14
hsa-mir-149	516.81	-0.9	0.005524	0.03667	chr2
hsa-mir-485	14.97	-0.9	0.000575	0.006289	chr14
hsa-mir-377	10.77	-0.9	0.000456	0.005371	chr14
hsa-mir-134	1321.87	-0.9	4.48e-05	0.000798	chr14
hsa-mir-431	37.07	-0.9	0.000494	0.005649	chr14
hsa-mir-379	2568.02	-0.9	0.000256	0.003463	chr14
hsa-mir-345	74.64	-1	0.000205	0.002979	chr14
hsa-mir-887	30.51	-1	0.00195	0.015799	chr5
hsa-mir-3607	284.27	-1	0.000709	0.007501	NA
hsa-mir-496	8.12	-1	0.000953	0.008871	chr14
hsa-mir-3170	6.79	-1	0.000841	0.008203	chr13
hsa-mir-299	11.68	-1	0.00011	0.001802	chr14
hsa-mir-655	8.12	-1	0.000156	0.002432	chr14
hsa-mir-1266	50.71	-1.1	3.85e-05	0.000728	chr15
hsa-mir-654	72.56	-1.1	2.69e-05	0.000526	chr14
hsa-mir-539	36.09	-1.1	8.02e-05	0.001387	chr14
hsa-mir-3653	33.19	-1.1	1.18e-05	0.000237	NA
hsa-mir-190b	65.09	-1.1	0.007751	0.047417	chr1
hsa-mir-214	114.82	-1.1	2.83e-07	8.7e-06	chr1
hsa-mir-196b	1097.65	-1.1	0.000178	0.002661	chr7
hsa-mir-487b	16.3	-1.1	9.23e-06	0.000206	chr14
hsa-mir-370	34.06	-1.2	3.32e-06	8.29e-05	chr14
hsa-mir-369	32.21	-1.2	2.12e-07	7.37e-06	chr14
hsa-mir-758	64.31	-1.2	3.12e-06	8.1e-05	chr14
hsa-mir-210	2086.53	-1.2	0.00081	0.008147	chr11
hsa-mir-154	23.11	-1.2	7.2e-08	3.21e-06	chr14
hsa-mir-375	87622.9	-1.3	0.001349	0.011852	chr2
hsa-mir-1248	6.63	-1.3	8.22e-05	0.001387	chr3
hsa-mir-411	22.05	-1.4	1.57e-07	5.78e-06	chr14
hsa-mir-935	11.77	-1.4	0.006044	0.038878	chr19
hsa-mir-4662a	108.99	-1.5	2.25e-06	6.09e-05	chr8
hsa-mir-494	5.56	-1.5	1.89e-06	5.37e-05	chr14
hsa-mir-432	22.95	-1.6	1.05e-07	4.1e-06	chr14
hsa-mir-493	42.03	-1.8	2.67e-12	2.78e-10	chr14
hsa-mir-376c	18.94	-1.8	5.3e-12	4.14e-10	chr14
hsa-mir-376b	6.98	-2.1	2.7e-11	1.68e-09	chr14
hsa-mir-135a-2	11.21	-2.4	0.0009	0.008512	chr12
hsa-mir-483	22.12	-2.4	1.26e-10	7.14e-09	chr11
hsa-mir-374c	7.29	-2.4	0.003216	0.023613	chrX
hsa-mir-135a-1	8.73	-2.5	0.000443	0.005311	chr3
hsa-mir-105-1	46.05	-2.9	0.003655	0.025625	chrX
hsa-mir-105-2	45.85	-2.9	0.003405	0.024708	chrX
hsa-mir-885	8.06	-3.2	2.93e-07	8.7e-06	chr3
hsa-mir-1269a	240.32	-10.3	3.67e-27	2.29e-24	chr4

## Sheet: Table S8
Table S8. AA vs CA over all
miRNA	log2FC	P-adj
hsa-mir-20a	0.9 (Up)	2.52e-24
hsa-mir-135b	0.9 (Up)	2.62e-05
hsa-mir-584	0.7 (Up)	2.55e-10
hsa-mir-17	0.6 (Up)	3.83e-12
hsa-mir-532	0.6 (Up)	2.74e-23
hsa-mir-10a	-0.7 (Down)	1.18E-08
hsa-mir-29c	-0.2 (Down)	0.111358
hsa-mir-375	-0.1 (Down)	0.640543
